# Supplementary material for: Rad51 recruitment and exclusion of non-homologous end joining during homologous recombination at a Tus/Ter mammalian replication fork barrier
Source: PubMed Central journal article supplement (PMC6067765; doi:10.1371/journal.pgen.1007486), 2018-07-19

**A**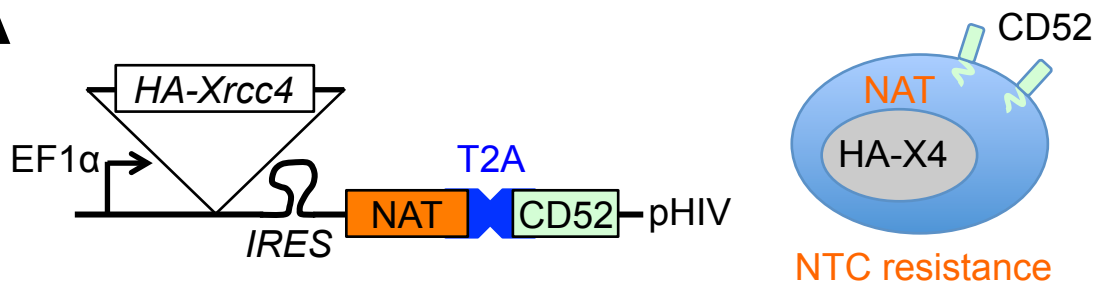**B**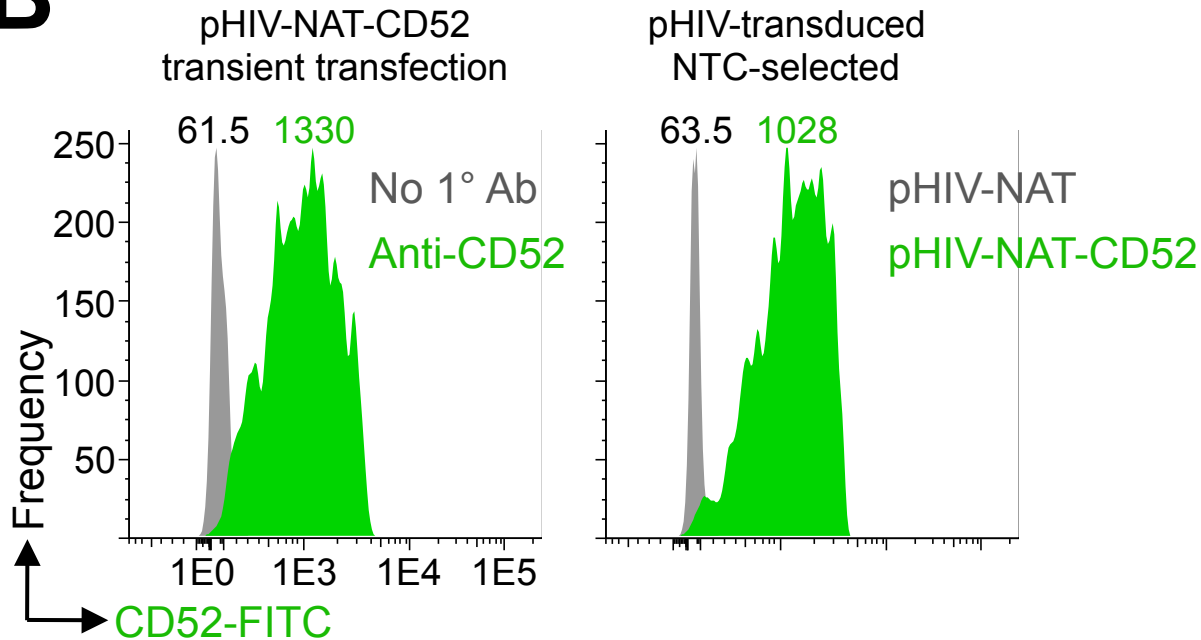

Supplement: pgen.1007486.s001.pdf [file pgen.1007486.s001.pdf]
