# Supplementary material for: Rad51 recruitment and exclusion of non-homologous end joining during homologous recombination at a Tus/Ter mammalian replication fork barrier
Source: PubMed Central journal article supplement (PMC6067765; doi:10.1371/journal.pgen.1007486), 2018-07-19

**A**

■ ■ + pcDNA3  
■ ■ + pcDNA3-mXRCC4

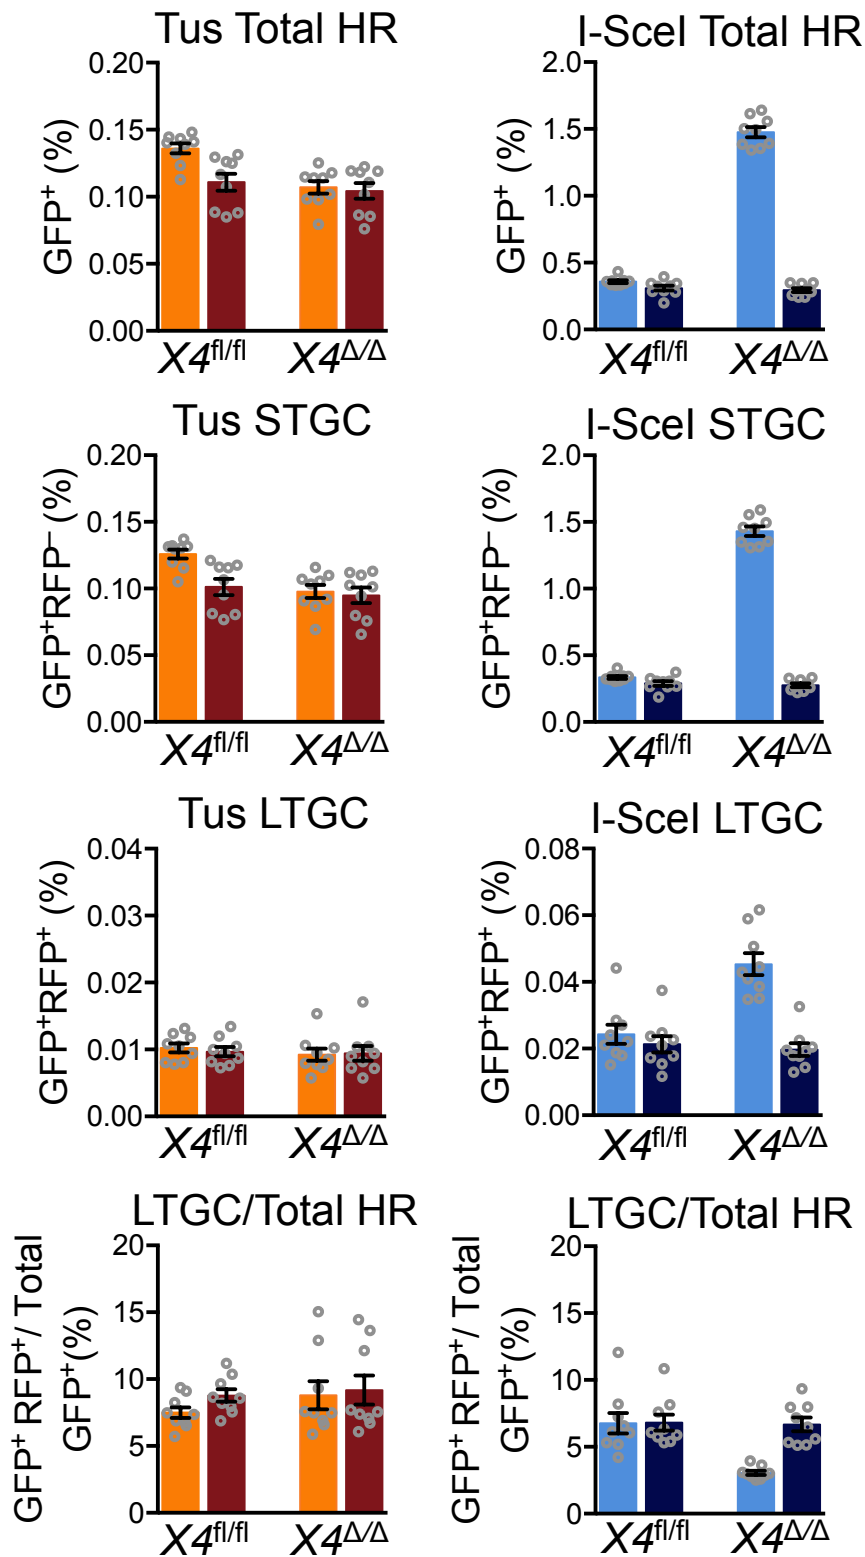**B**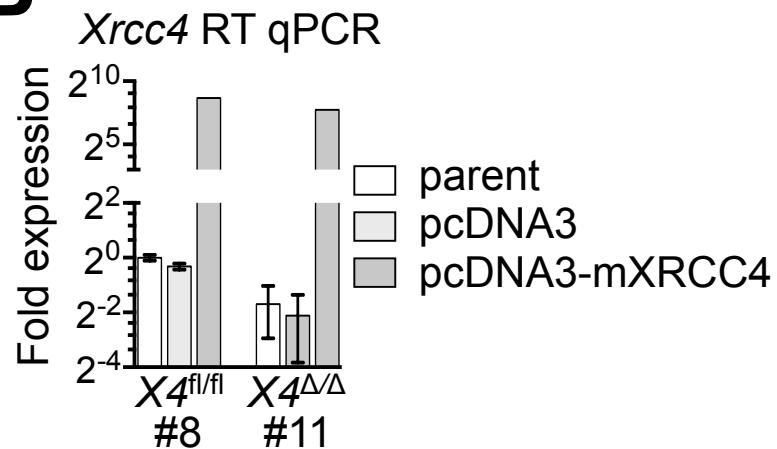**C**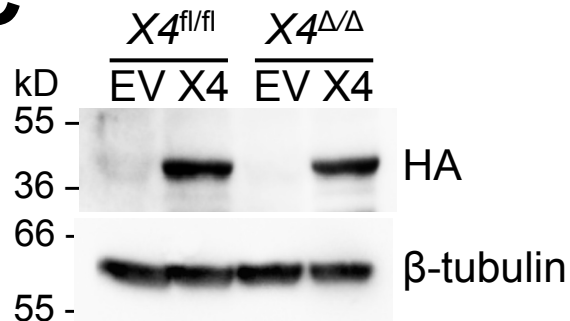

Supplement: pgen.1007486.s002.pdf [file pgen.1007486.s002.pdf]
